# Supplementary material for: Bacterial microcompartment utilisation in the human commensal Escherichia coli Nissle 1917
Source: PubMed Central journal article supplement (PMC7617246; doi:10.1128/jb.00269-24), 2024-12-05
Supplement: EMS201728-supplement-Supplementary_Information.pdf [file EMS201728-supplement-Supplementary_Information.pdf]

# Supplementary Information: Bacterial microcompartment utilisation in the human commensal *Escherichia coli* Nissle 1917

Chania Clare<sup>1</sup>, Jack W. Rutter<sup>1</sup>, Alex J.H. Fedorec<sup>1</sup>, Stefanie Frank<sup>2</sup>, and Chris P. Barnes<sup>1,3</sup>

<sup>1</sup>*Department of Cell and Developmental Biology, University College London, London, UK*

<sup>2</sup>*Department of Biochemical Engineering, University College London, London, UK*

<sup>3</sup>*Department of Genetics, Evolution and Environment, University College London, London, UK*

E-mail: christopher.barnes@ucl.ac.uk

## 1 Extended materials and methods

**Tables S1-S3** contain statistical analysis, **Table S4** contains *eut* operon protein sequence homology between EcN and EcBW. **Tables S5-S7** contain summaries of models used in Flux Balance Analysis.

Table S 1: **Test statistics corresponding to values from Fig 2F, where the carry capacity is estimated with the Gompertz function  $\pm$  standard error, where each condition for each species is compared to EA + B<sub>12</sub>**

| Species | Condition            | Estimated Carry Capacity | P-value    |
|---------|----------------------|--------------------------|------------|
| EcBW    | No addition          | $0.119 \pm 0.00100$      | 0.54       |
|         | EA                   | $0.123 \pm 0.00184$      | 0.66       |
|         | B <sub>12</sub>      | $0.130 \pm 0.00128$      | 0.08       |
|         | EA + B <sub>12</sub> | $0.121 \pm 0.00356$      |            |
| EcN     | No addition          | $0.140 \pm 0.000980$     | 0.0000055  |
|         | EA                   | $0.126 \pm 0.00199$      | 0.0000053  |
|         | B <sub>12</sub>      | $0.120 \pm 0.00118$      | 0.0000033  |
|         | EA + B <sub>12</sub> | $0.262 \pm 0.00367$      |            |
| Sent    | No addition          | $0.0793 \pm 0.000516$    | 0.00000029 |
|         | EA                   | $0.0811 \pm 0.000413$    | 0.00000029 |
|         | B <sub>12</sub>      | $0.0795 \pm 0.000526$    | 0.00000029 |
|         | EA + B <sub>12</sub> | $0.341 \pm 0.00384$      |            |

Table S 2: **Test statistics corresponding to values from Fig 3B-C, where the mean fold change of cultures supplemented with EA + B<sub>12</sub> are compared to those supplemented with glucose instead,  $\pm$  SEM.**

| Species | Gene | Mean Fold Change    | p-value     |
|---------|------|---------------------|-------------|
| EcN     | EutS | 30.051 $\pm$ 0.877  | 0.0000085   |
|         | EutB | 25.748 $\pm$ 0.890  | 0.000011    |
|         | EutR | 12.740 $\pm$ 0.879  | 0.000000073 |
| EcBW    | EutS | 219.176 $\pm$ 0.803 | 0.00000011  |
|         | EutB | 1.245 $\pm$ 0.812   | 0.75        |
|         | EutR | 170.989 $\pm$ 0.822 | 0.0000015   |

Table S 3: **Test statistics corresponding to values from Fig 4E, where the mean NH<sub>4</sub><sup>+</sup> concentration  $\pm$  SEM is compared within each species when grown in media supplemented with either EA + B<sub>12</sub> or glucose as a carbon source.**

| Species | Condition            | Mean [NH <sub>4</sub> <sup>+</sup> ] | p-value  |
|---------|----------------------|--------------------------------------|----------|
| EcN     | EA + B <sub>12</sub> | 0.0360 $\pm$ 0.000649                | 0.000088 |
|         | Glucose              | 0.0228 $\pm$ 0.000505                |          |
| Sent    | EA + B <sub>12</sub> | 0.0222 $\pm$ 0.000841                | 0.5353   |
|         | Glucose              | 0.0216 $\pm$ 0.000278                |          |

Table S 4: **Protein sequence homology of proteins comprising *eut* operon between EcN and BW25113**

| Protein | No. amino acids | % identity between EcN and BW25113 |
|---------|-----------------|------------------------------------|
| eutS    | 111             | 100.00                             |
| eutP    | 159             | 97.48                              |
| eutQ    | 233             | 97.00                              |
| eutT    | 267             | 100.00                             |
| eutD    | 338             | 99.70                              |
| eutM    | 97              | 100.00                             |
| eutN    | 95              | 100.00                             |
| eutE    | 467             | 98.93                              |
| eutJ    | 278             | 98.56                              |
| eutG    | 395             | 98.73                              |
| eutH    | 408             | 99.02                              |
| eutA    | 467             | 98.07                              |
| eutB    | 453             | 99.78                              |
| eutC    | 295             | 99.66                              |
| eutL    | 219             | 97.26                              |
| eutK    | 166             | 98.80                              |
| eutR    | 350             | 98.86                              |

Table S 5: **Summary of each model used in this study**

|                                | <b>iJO1366</b><br>BW25113 2011                | <b>iHM1533</b><br>EcN 2022                       | <b>STM_v1.0</b><br>Sent 2011                     |
|--------------------------------|-----------------------------------------------|--------------------------------------------------|--------------------------------------------------|
| Chromosome size of strain (Mb) | 4.63                                          | 5.44                                             | 4.86                                             |
| Number of reactions            | 2583                                          | 3143                                             | 2546                                             |
| Number of metabolites          | 1805                                          | 2261                                             | 1802                                             |
| Number of genes                | 1367                                          | 1533                                             | 1271                                             |
| Compartments                   | cytosol;<br>extracellular<br>space; periplasm | cytosol;<br>extracellular<br>space;<br>periplasm | cytosol;<br>extracellular<br>space;<br>periplasm |

Table S 6: **Inclusion of metabolites of the *eut* BMC metabolic pathway within each model.** Metabolite ID and names are given as standard GEM notation, and each model name is given alongside its species and year the model was created.

| Metabolite Name  | Metabolite ID | iJO1366 EcBW 2011 | iJO1366_CC EcBW 2024 | iHM1533 EcN 2022 | iHM1533_CC EcN 2024 | STM v1.0 Sent 2011 |
|------------------|---------------|-------------------|----------------------|------------------|---------------------|--------------------|
| Acetaldehyde     | acald_e       | ×                 | ×                    | ×                | ×                   | ×                  |
| Acetaldehyde     | acald_c       | ✓                 | ✓                    | ✓                | ✓                   | ✓                  |
| Acetyl phosphate | actp_c        | ✓                 | ✓                    | ✓                | ✓                   | ✓                  |
| Acetyl-CoA       | accoa_c       | ✓                 | ✓                    | ✓                | ✓                   | ✓                  |
| Ammonium         | nh4_e         | ✓                 | ✓                    | ✓                | ✓                   | ✓                  |
| Ammonium         | nh4_p         | ✓                 | ✓                    | ✓                | ✓                   | ✓                  |
| Ammonium         | nh4_c         | ✓                 | ✓                    | ✓                | ✓                   | ✓                  |
| Coenzyme A       | coa_c         | ✓                 | ✓                    | ✓                | ✓                   | ✓                  |
| Ethanol          | etoh_e        | ✓                 | ✓                    | ✓                | ✓                   | ✓                  |
| Ethanol          | etoh_p        | ✓                 | ✓                    | ✓                | ✓                   | ✓                  |
| Ethanol          | etoh_c        | ✓                 | ✓                    | ✓                | ✓                   | ✓                  |
| Ethanolamine     | etha_e        | ✓                 | ✓                    | ✓                | ✓                   | ✓                  |
| Ethanolamine     | etha_p        | ✓                 | ✓                    | ✓                | ✓                   | ✓                  |
| Ethanolamine     | etha_c        | ✓                 | ✓                    | ✓                | ✓                   | ✓                  |
| H+               | h_e           | ✓                 | ✓                    | ✓                | ✓                   | ✓                  |
| H+               | h_p           | ✓                 | ✓                    | ✓                | ✓                   | ✓                  |
| H+               | h_c           | ✓                 | ✓                    | ✓                | ✓                   | ✓                  |
| NAD              | nad_c         | ✓                 | ✓                    | ✓                | ✓                   | ✓                  |
| NADH             | nadh_c        | ✓                 | ✓                    | ✓                | ✓                   | ✓                  |
| Phosphate        | pi_e          | ✓                 | ✓                    | ✓                | ✓                   | ✓                  |
| Phosphate        | pi_p          | ✓                 | ✓                    | ✓                | ✓                   | ✓                  |
| Phosphate        | pi_c          | ✓                 | ✓                    | ✓                | ✓                   | ✓                  |

Table S 7: **Inclusion of reactions of the *eut* BMC metabolic pathway within each model.**

Reaction ID and names are given as standard GEM notation, and each model name is given alongside its species and year the model was created.

| Reaction ID | Reaction                                       | iJO1366 EcBW 2011 | iJO1366_CC EcBW 2024 | iHM1533 EcN 2022 | iHM1533_CC EcN 2024 | STM v1.0 Sent 2011 |
|-------------|------------------------------------------------|-------------------|----------------------|------------------|---------------------|--------------------|
| Ex_acald_e  | acald_e <=>                                    | ✓                 | ✓                    | ✓                | ✓                   | ✓                  |
| ALCD2x      | etoh_c + nad_c<br><=>acald_c + h_c +<br>nadh_c | ✓                 | ✓                    | ✓                | ✓                   | ✓                  |
| EX_nh4_e    | nh4_e <=>                                      | ✓                 | ✓                    | ✓                | ✓                   | ✓                  |
| NH4tpp      | nh4_p <=>nh4_c                                 | ✓                 | ✓                    | ✓                | ✓                   | ✓                  |
| NH4tex      | nh4_e <=>nh4_p                                 | ✓                 | ✓                    | ✓                | ✓                   | ✓                  |
| Ex_etoh_e   | etoh_e <=>                                     | ✓                 | ✓                    | ✓                | ✓                   | ✓                  |
| ETOHtrpp    | etoh_p <=>etoh_c                               | ✓                 | ✓                    | ✓                | ✓                   | ✓                  |
| ETOHtex     | etoh_e <=>etoh_p                               | ✓                 | ✓                    | ✓                | ✓                   | ✓                  |
| ETHAAL      | etha_c ->acald_c +<br>nh4_c                    | ✓                 | ✓                    | ✓                | ✓                   | ✓                  |
| EX_etha_e   | etha_e ->                                      | ✓                 | ✓                    | ✓                | ✓                   | ✓                  |
| ETHAt2pp    | etha_p + h_p<br>->etha_c + h_c                 | ✓                 | ✓                    | ✓                | ✓                   | ✓                  |
| ETHAtex     | etha_e <=>etha_p                               | ✓                 | ×                    | ×                | ✓                   | ✓                  |
| Ex_h_e      | h_e <=>                                        | ✓                 | ✓                    | ✓                | ✓                   | ✓                  |
| Ex_pi_e     | pi_e <=>                                       | ✓                 | ✓                    | ✓                | ✓                   | ✓                  |
| PItex       | pi_e <=>pi_p                                   | ✓                 | ✓                    | ✓                | ✓                   | ✓                  |
| PTAr        | accoa_c + pi_c<br><=>actp_c + coa_c            | ✓                 | ✓                    | ✓                | ✓                   | ✓                  |
| Htex        | h_e <=>h_p                                     | ✓                 | ✓                    | ✓                | ✓                   | ✓                  |

## 2 Extended results

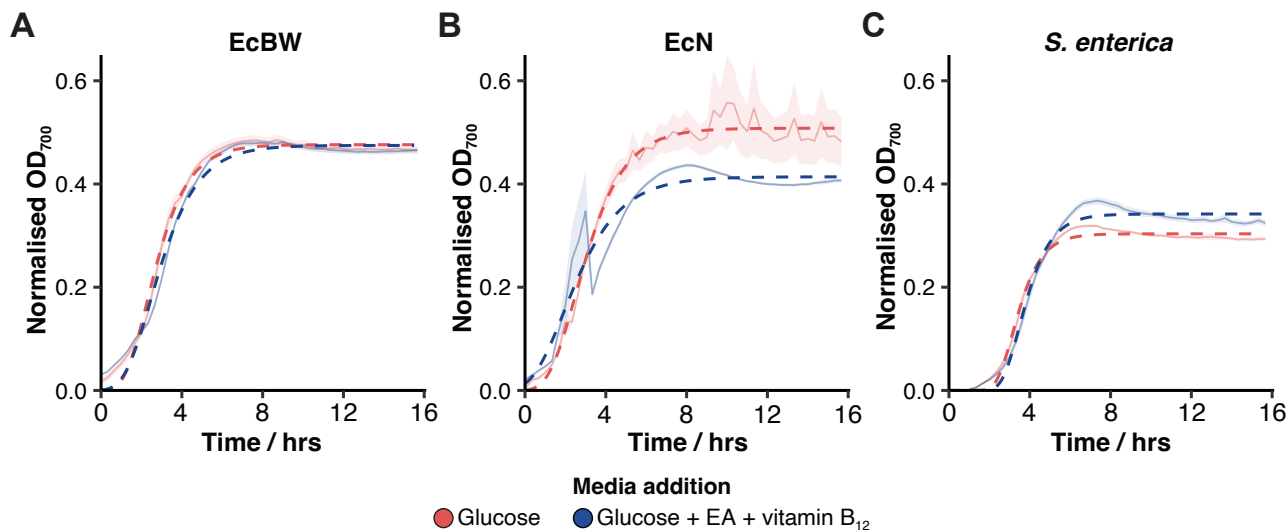

Figure S 1: **EA-dependent growth in *E. coli* Nissle 1917.** Growth curves of EcBW (A), EcN (B), and *S. enterica* (C) when grown in M9 supplemented with either glucose alone, or EA, vitamin B<sub>12</sub> and glucose, in triplicate. The mean and standard error are shown with a solid line and a pale ribbon, respectively, and the data was fitted with the Gompertz function shown by the respective dashed lines.

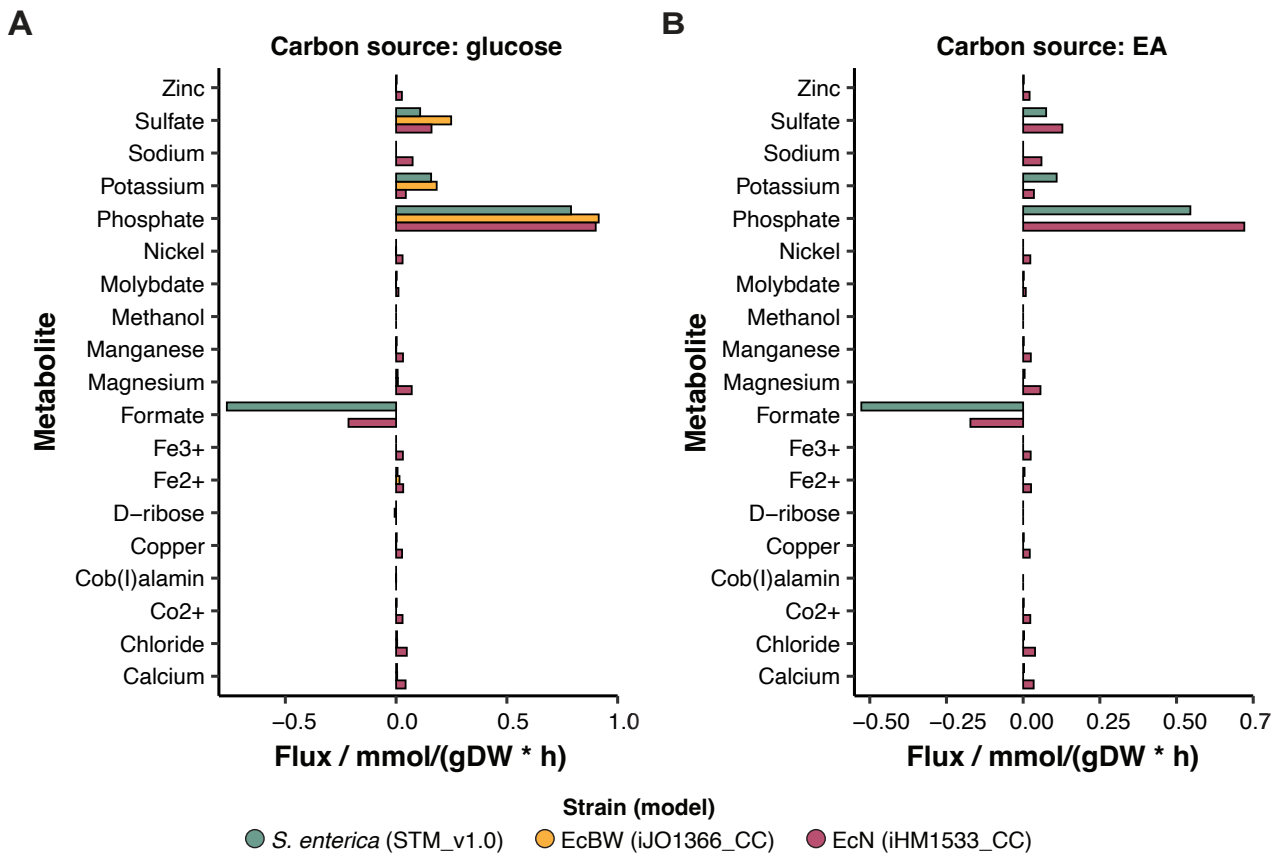

Figure S 2: **Metabolite flux prediction in *E. coli* Nissle 1917.** (A & B) Predicted flux from the FBA when the model is supplied with either EA or glucose as the sole carbon source, respectively .
